# Supplementary material for: The SIAH E3 ubiquitin ligases promote Wnt/β-catenin signaling through mediating Wnt-induced Axin degradation
Source: PubMed Central journal article supplement — Genes Dev. 2017 May 1;31(9):904–15. doi: 10.1101/gad.300053.117 (PMC5458757; doi:10.1101/gad.300053.117), 2017-05-01
Supplement: supp_gad.300053.117_Supplemental_Figure_Legend.pdf [file supp_gad.300053.117_Supplemental_Figure_Legend.pdf]

## Legends of Supplementary Figures

### **Figure S1 Depletion of SIAH1 inhibits Wnt signaling.**

**(A)** siRNAs against SIAH1 decrease the level of SIAH1 mRNA in HEK293 cells. **(B)** Depletion of SIAH1 inhibits the Wnt3a-induced cytosolic  $\beta$ -catenin accumulation in YAPC cells.

### **Figure S2. Depletion of SIAH1 increases the protein expression of AXIN1.**

**(A)** Depletion of SIAH1 does not affect the mRNA level of AXIN1 in YAPC cells. **(B)** Depletion of SIAH1 increases the protein level of AXIN1 in U2OS cells.

### **Figure S3. SIAH2 interacts with Axin1 in co-immunoprecipitation assay.**

Flag-Axin1 was co-expressed with HA-SIAH2 CS mutant in HEK293 cells, and subjected to co-immunoprecipitation assay.

### **Figure S4 Crystal structural of AXIN1/SIAH1 complex.**

**(A)** Superimposition of AXIN1/SIAH1 and SIAH1 (PDB 4CA1) structures. The structure of the human AXIN1/SIAH1 complex is similar to the unliganded SIAH1 structure, with a root mean square deviation (R.M.S.D) of C $\alpha$ 's of 0.837 Å. **(B)** Stereo view of the AXIN1 377-387 showing the 2Fo-Fc electron density map (grey mesh) contoured to 1.0 $\sigma$ . AXIN1 residues 388-394 were not observable in the structure because of a lack of visible electron density.

### **Figure S5. Wnt decreases the interaction between AXIN1 and GSK3 $\beta$ .**

HEK293 cells were pretreated with MG132 to prevent Wnt-induced Axin degradation, and then treated with Wnt3a for 4 hrs. Cells were collected and subjected to co-immunoprecipitation assay.
