# Supplementary material for: The SIAH E3 ubiquitin ligases promote Wnt/β-catenin signaling through mediating Wnt-induced Axin degradation
Source: PubMed Central journal article supplement — Genes Dev. 2017 May 1;31(9):904–15. doi: 10.1101/gad.300053.117 (PMC5458757; doi:10.1101/gad.300053.117), 2017-05-01
Supplement: supp_gad.300053.117_Supplemental_Table_S1.pdf [file supp_gad.300053.117_Supplemental_Table_S1.pdf]

**Table S1. Data collection and refinement statistics**

| PDB code: 5WZZ                    |                     |
|-----------------------------------|---------------------|
| <b>Data collection</b>            |                     |
| Space group                       | P 21                |
| Cell dimensions                   |                     |
| a, b, c (Å)                       | 41.5, 86.4, 117.4   |
| $\alpha$ , $\beta$ , $\gamma$ (°) | 90.00, 98.43, 90.00 |
| Resolution (Å)                    | 20–2.1 (2.14–2.20)* |
| Rsym or Rmerge                    | 8.1 (58.9)*         |
| I / $\sigma$ I                    | 30.0 (1.8)*         |
| CC <sub>1/2</sub>                 | 0.955 (0.869)*      |
| Completeness (%)                  | 99.6 (98.7)*        |
| Redundancy                        | 6.3 (5.2)*          |
| <b>Refinement</b>                 |                     |
| Resolution (Å)                    | 38 - 2.1            |
| No. reflections                   | 47,337              |
| Rwork / Rfree                     | 18.27, 20.75        |
| No. atoms                         |                     |
| Protein                           | 6235                |
| Ion                               | 8                   |
| Water                             | 244                 |
| B-factors                         |                     |
| Protein                           | 53.4                |
| Ion                               | 48.6                |
| Water                             | 50.4                |
| R.m.s. deviations                 |                     |
| Bond lengths (Å)                  | 0.010               |
| Bond angles (°)                   | 1.384               |

\*Values in parentheses are for highest-resolution shell.
