# Supplementary figures and images for: The SIAH E3 ubiquitin ligases promote Wnt/β-catenin signaling through mediating Wnt-induced Axin degradation
Source: PubMed Central journal article supplement — Genes Dev. 2017 May 1;31(9):904–15. doi: 10.1101/gad.300053.117 (PMC5458757; doi:10.1101/gad.300053.117), 2017-05-01

**A**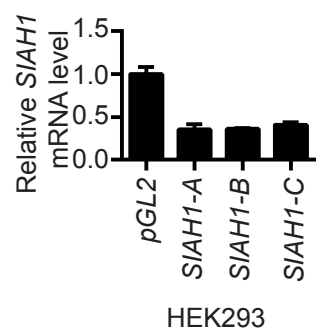**B**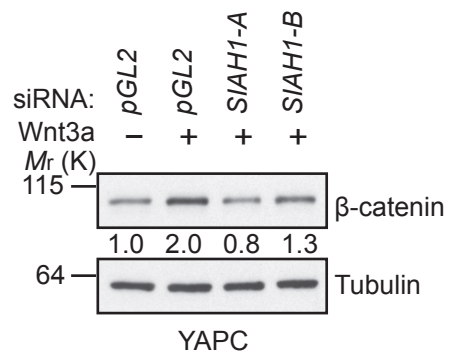

Supplement: supp_gad.300053.117_Supplemental_Fig_S1.pdf [file supp_gad.300053.117_Supplemental_Fig_S1.pdf]

**A**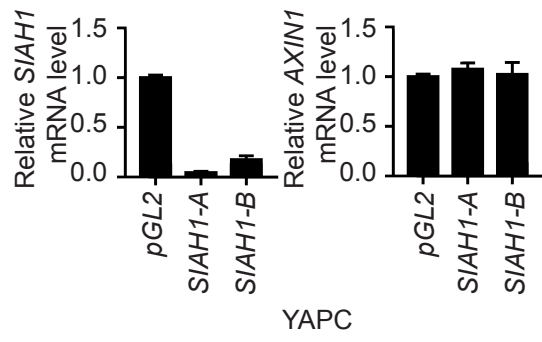**B**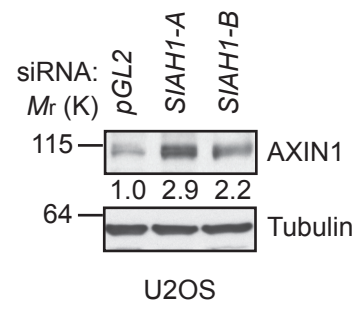

Supplement: supp_gad.300053.117_Supplemental_Fig_S2.pdf [file supp_gad.300053.117_Supplemental_Fig_S2.pdf]

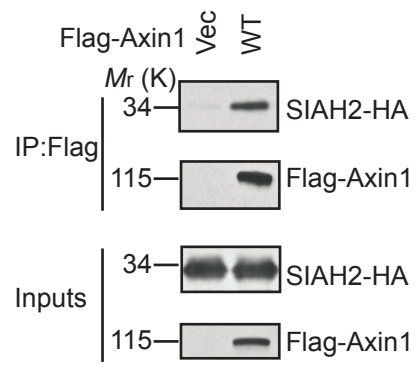

Supplement: supp_gad.300053.117_Supplemental_Fig_S3.pdf [file supp_gad.300053.117_Supplemental_Fig_S3.pdf]

**A**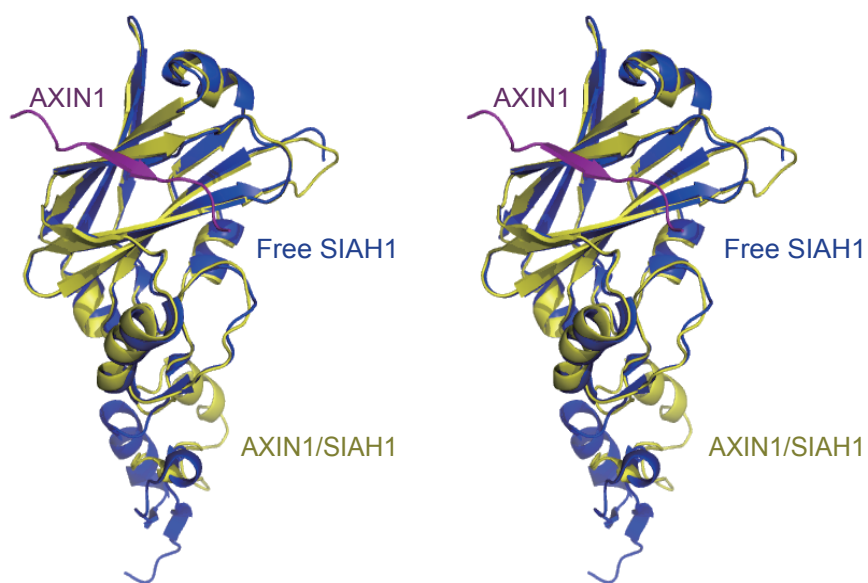**B**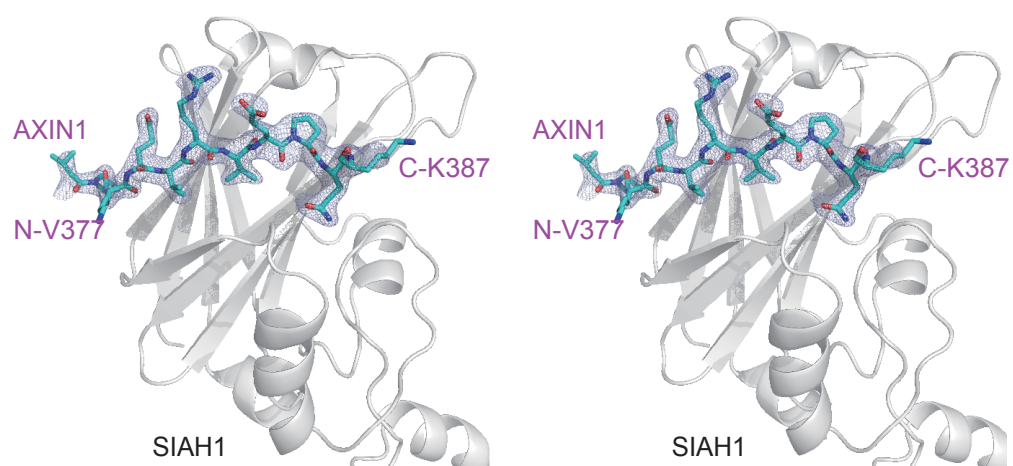

Supplement: supp_gad.300053.117_Supplemental_Fig_S4.pdf [file supp_gad.300053.117_Supplemental_Fig_S4.pdf]

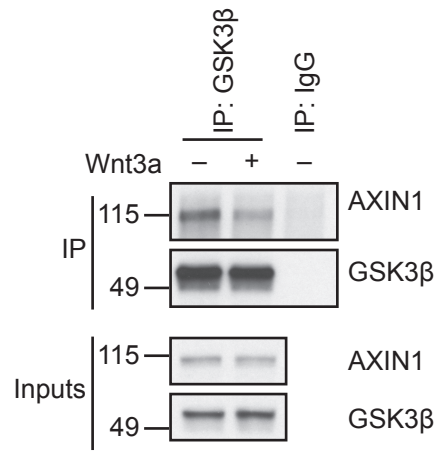

Supplement: supp_gad.300053.117_Supplemental_Fig_S5.pdf [file supp_gad.300053.117_Supplemental_Fig_S5.pdf]
